# Supplementary material for: Adolescent cannabidiol treatment produces antidepressant-like effects without compromising long-term cognition in rats
Source: Springer Nature journal article supplement (doi:10.1007/s43440-025-00750-5), 2025-06-16
Supplement: MOESM1 [file 43440_2025_750_MOESM1_ESM.pdf]

Acute effects  
30 min post-treatment

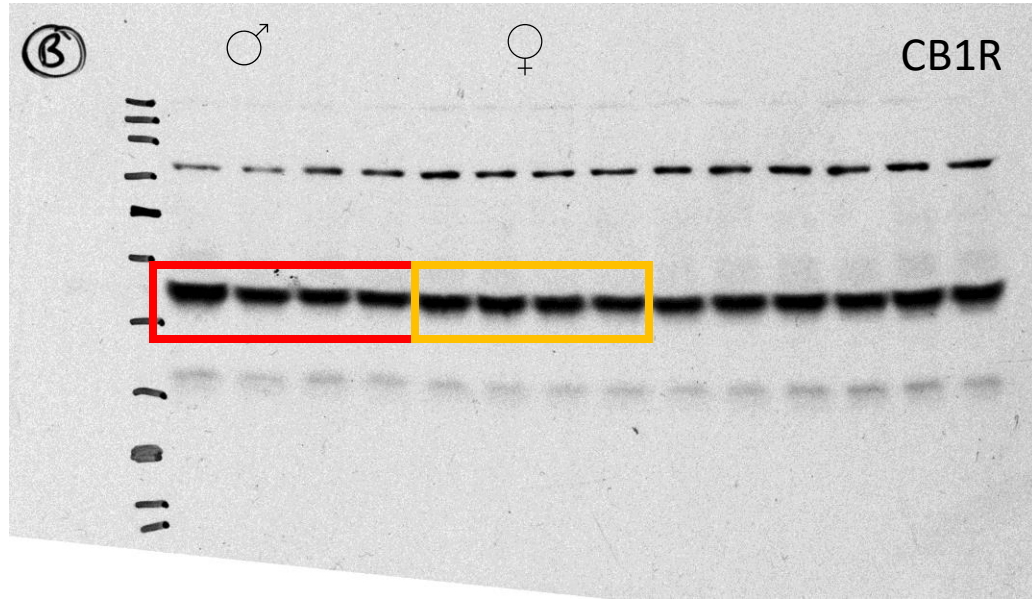

Repeated effects  
24 h post-treatment

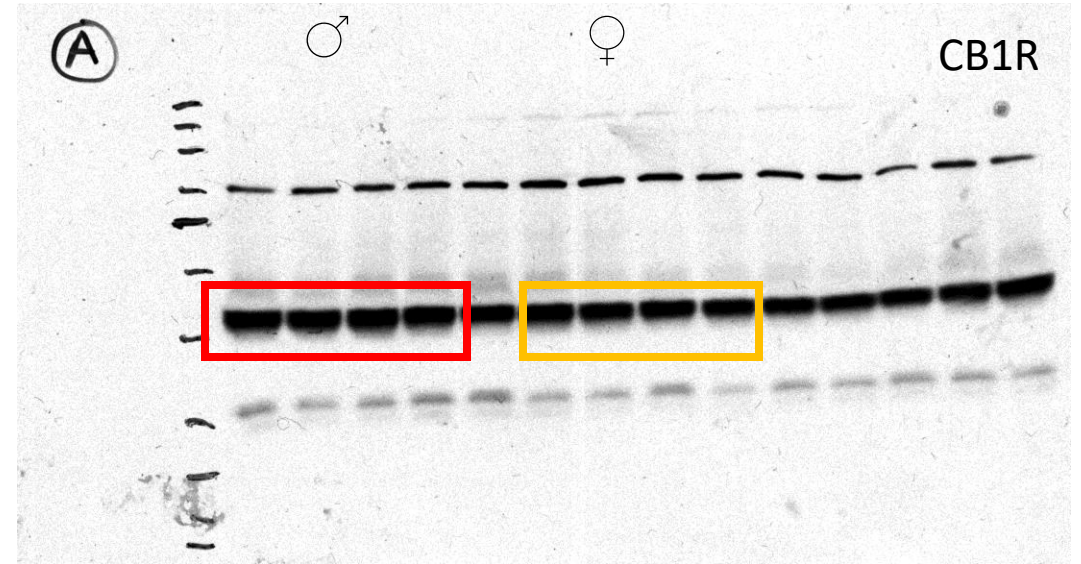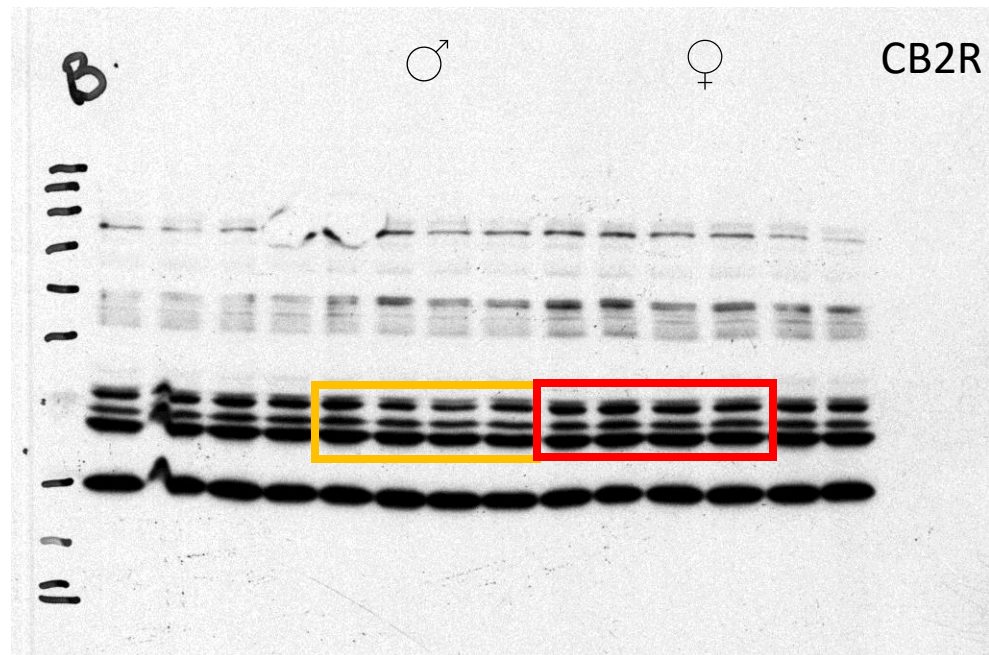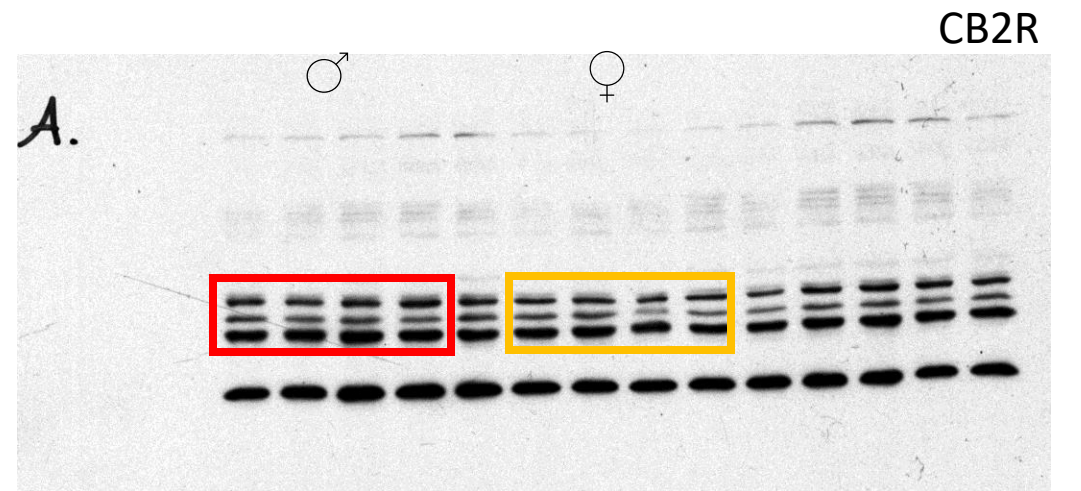

♂  
male

♀  
female

Orden in all gels: C-CBD10-CBD30-CBD60

Acute effects  
30 min post-treatment

Repeated effects  
24 h post-treatment

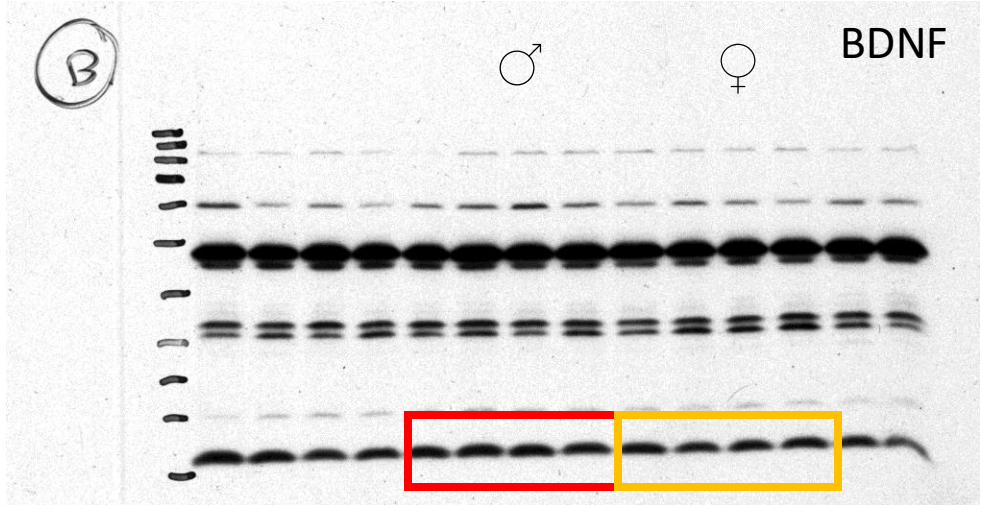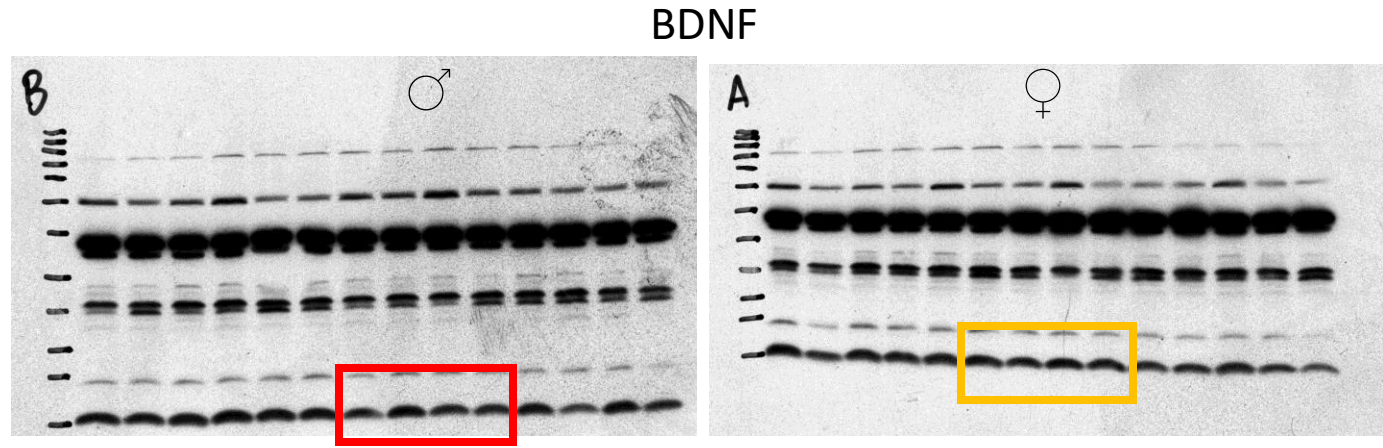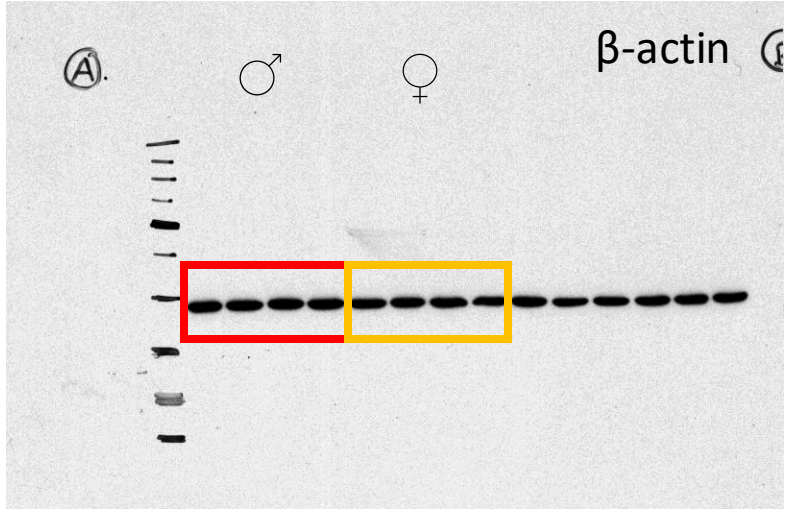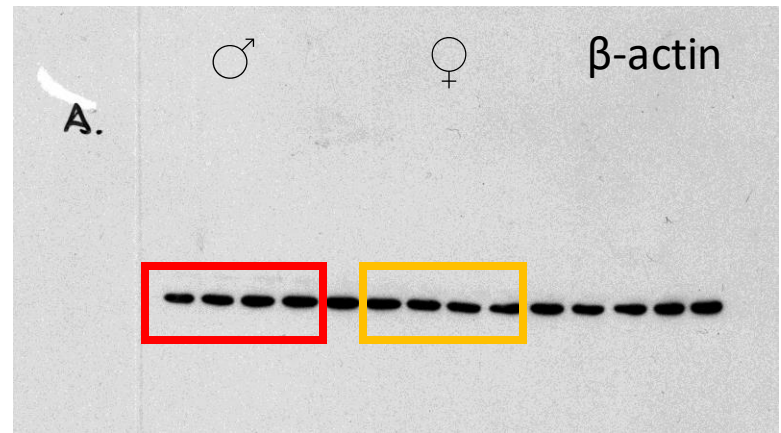

♂      ♀  
male      female      Orden in all gels: C-CBD10-CBD30-CBD60
